# Supplementary material for: The Wedelolactone Derivative Inhibits Estrogen Receptor-Mediated Breast, Endometrial, and Ovarian Cancer Cells Growth
Source: Hindawi journal article supplement (doi:10.1155/2014/713263), 2014-01-01
Supplement: f1 [file 713263.f1.zip]

| Cell       | IC50 (μM) (10nM E2) | IC50 (μM) |
|------------|---------------------|-----------|
| MCF-7      | 18.3±2.0            | 29.6±2.0  |
| Ishikawa   | 32.2±2.0            | 63.2±3.5  |
| SKOV-3     | 41.9±2.5            | 79.6±4.0  |
| MBA-MD-231 | 42.5±3.5            | 43.8±2.5  |
| HEC-1-A    | 80.4±4.5            | 84.3±4.5  |
| OVCA429    | 77.5±4.5            | 80.3±4.5  |
