# Supplementary material for: The Wedelolactone Derivative Inhibits Estrogen Receptor-Mediated Breast, Endometrial, and Ovarian Cancer Cells Growth
Source: Hindawi journal article supplement (doi:10.1155/2014/713263), 2014-01-01
Supplement: f1 [file 713263.f1.zip]

Archive with 2 entries (2 files):
- Supplementary Document.docx
- table 1.pdf
